# Supplementary material
Source: PubMed Central journal article supplement (PMC4475890)
Supplement: AEM.00679-15_zam999116360so1.pdf [file AEM.00679-15_zam999116360so1.pdf]

Supplemental Table 1. Sequencing Statistics

|                          | <b>454</b>         |                    | <b>Ion Torrent</b> |                    | <b>Combined</b>      |                    |
|--------------------------|--------------------|--------------------|--------------------|--------------------|----------------------|--------------------|
|                          | <b>CA</b>          | <b>CA6</b>         | <b>CA</b>          | <b>CA6</b>         | <b>CA</b>            | <b>CA6</b>         |
| <b>Total Reads</b>       | 607,789            | 568,103            | 463,121            | 452,254            | 1,070,910            | 1,020,357          |
| <b>Used Reads (%)</b>    | 606,450<br>(99.8%) | 566,774<br>(99.8%) | 424,539<br>(91.7%) | 424,875<br>(93.9%) | 1,030,989<br>(96.3%) | 991,649<br>(97.2%) |
| <b>Mean Read Length</b>  | 412.2              | 429.5              | 214.3              | 214.2              | 330.7                | 337.2              |
|                          | $\pm 126.3$        | $\pm 113.3$        | $\pm 37.3$         | $\pm 41$           | $\pm 139.4$          | $\pm 139.3$        |
| <b>Read Length Range</b> | 40-597             | 40-595             | 14-394             | 14-393             | 14-597               | 14-595             |
| <b>Mean Depth</b>        | 46.8 $\pm$ 13      | 45.6 $\pm$ 14.4    | 18.9 $\pm$ 14.1    | 19.2 $\pm$ 15.6    | 66.1 $\pm$ 22.7      | 65.4 $\pm$ 25.8    |
| <b>Depth Range</b>       | 0-160              | 0-139              | 0-106              | 0-108              | 0-190                | 0-228              |
| <b>Coverage</b>          | 47                 | 46                 | 17                 | 17                 | 64                   | 63                 |

Supplemental Table 2. Variations Discovered in Genome Comparison. Position column contains nucleotide position in DJ. \* - stop codon. Variant Frequency refers to percentage of sequencing reads showing each variation.

| Locus Tag               | Gene Function                           | Position        | CDS Position | Base/AA Change      | Variant Frequency |            |
|-------------------------|-----------------------------------------|-----------------|--------------|---------------------|-------------------|------------|
| <b>Mutations in CA6</b> |                                         |                 |              |                     |                   |            |
| AvCA6_14900             | Glycerol-3-phosphate acyltransferase    | 1470474         | 854/987      | G:A/G:D             | 100%              |            |
| AvCA6_27910             | Flagellar biosynthesis                  | 2871708         | 1568/2085    | G:A/E:*             | 100%              |            |
|                         |                                         | 3868591         |              | C:T                 | 56%               |            |
|                         | many                                    | 5102868-5144962 |              | -42095bp/many genes | 100%              |            |
| <b>Mutations in CA</b>  |                                         |                 |              |                     |                   |            |
|                         |                                         | 500008          |              | +ATTCCTTC           | 100%              |            |
| AvCA_11230              | cation transporter                      | 1072498         | 765/1071     | +GACCAT/+DH         | 96%               |            |
| AvCA_12720              | Peptidase, modulator of DNA gyrase      | 1240550         | 896/1443     | C:T/Q:*             | 100%              |            |
| AvCA_18210              | hypothetical protein                    | 1805893         | 375/762      | -GC/Frameshift      | 94%               |            |
| AvCA_24220              | Flagellar motor switch                  | 2417604         | 144/996      | G:A/E:*             | 98%               |            |
| AvCA_36670              | TolQ proton channel                     | 3728269         | 481/696      | G:A                 | 100%              |            |
|                         |                                         | 4686485         |              | +1053bp             | 100%              |            |
| <b>Mutations in DJ</b>  |                                         |                 |              |                     | <b>CA</b>         | <b>CA6</b> |
| Avin_02860              | Hypothetical                            | 270373          | 163/369      | C:T/P:L             | 98%               | 100%       |
|                         |                                         | 278677          |              | C:T                 | 100%              | 97%        |
| Avin_06870              | Hybrid histidine kinase                 | 650766          | 2715/2802    | G:C/H:D             | 100%              | 99%        |
| Avin_06870              | Hybrid histidine kinase                 | 652277          | 807/2802     | -AGGGCG/-AL         | 100%              | 100%       |
| Avin_07570              | Membrane bound protease regulator       | 716487          | 564/870      | -CGCGAG/-RE         | 100%              | 100%       |
|                         |                                         | 1504215         |              | -A                  | 81%               | 78%        |
|                         |                                         | 2199316         |              | +G                  | 98%               | 97%        |
| Avin_22710              | Heavy metal translocating P-type ATPase | 2265546         | 357/2160     | G:A/A:T             | 100%              | 100%       |
|                         |                                         | 3182849         |              | +TGGCGGATGGCGGA     | 100%              | 100%       |
| Avin_33130              | TonB-dependent vitamin B12 receptor     | 3387906         | 2009/3072    | -G/Frameshift       | 97%               | 93%        |
| Avin_40360              | Chaperone HscA                          | 4087773         | 1518/1866    | +GCA/+L             | 100%              | 100%       |
| Avin_44040              | Enoyl-(Acyl carrier protein) reductase  | 4455982         | 601/783      | C:T/P:L             | 100%              | 100%       |
|                         |                                         | 4492914         |              | +C                  | 98%               | 100%       |
| Avin_45560              | proline iminopeptidase                  | 4626694         | 673/968      | +CG/Frameshift      | 99%               | 100%       |

|            |                                   |         |           |             |      |      |
|------------|-----------------------------------|---------|-----------|-------------|------|------|
| Avin_46380 | major facilitator<br>superfamily  | 4713376 | 1121/1558 | +CATGAT/+IM | 100% | 100% |
| Avin_52160 | F0F1 ATP synthase<br>subunit beta | 5330589 | 653/1377  | G:A/A:V     | 99%  | 100% |
